# Supplementary material for: The case-area targeted rapid response strategy to control cholera in Haiti: a four-year implementation study
Source: PubMed Central journal article supplement (PMC6485755; doi:10.1371/journal.pntd.0007263), 2019-04-16
Supplement: pntd.0007263.s001.pdf [file pntd.0007263.s001.pdf]

**S1 Table. Main organizations involved in case-area targeted interventions (CATIs).**

| Acronym                                                                                                    | Name of organization                                                                 | Zone of activity                                             |
|------------------------------------------------------------------------------------------------------------|--------------------------------------------------------------------------------------|--------------------------------------------------------------|
| Haitian governmental response teams                                                                        |                                                                                      |                                                              |
| EMIRA                                                                                                      | Departmental rapid response mobile teams of the Ministry of Health                   | Every department since 2014                                  |
| WASH (Water Sanitation and Hygiene promotion) non-governmental organizations (mainly contracted by UNICEF) |                                                                                      |                                                              |
| ACF <sup>ab</sup>                                                                                          | Action Against Hunger                                                                | DSA and DSNO since 2013                                      |
| ACTED <sup>ab</sup>                                                                                        |                                                                                      | DSS since 2013, DSGA, DSA and DSO since 2014, DSC since 2016 |
| Care <sup>ab</sup>                                                                                         |                                                                                      | DSGA in 2013                                                 |
| FONDEFH <sup>ab</sup>                                                                                      | <i>Fondation pour le développement et l'encadrement de la famille haïtienne</i>      | DSN and DSNE in 2013                                         |
| FRC <sup>ab</sup>                                                                                          | French Red Cross, works with Haitian Red Cross                                       | DSO since 2013, DSA in 2015-2016                             |
| IFRC <sup>ab</sup>                                                                                         | International Federation of Red Cross and Red Crescent, works with Haitian Red Cross | DSO since 2017                                               |
| Oxfam <sup>ab</sup>                                                                                        | Worked with OSAPO ( <i>Oganizasyon Sante Popilè</i> ) in 2013                        | DSN and DSNE since 2013, DSC since 2015                      |
| PLAN <sup>ab</sup>                                                                                         | Plan International                                                                   | DSSE in 2013                                                 |
| RCG <sup>a</sup>                                                                                           | Red Cross Germany, works with Haitian Red Cross                                      | DSO in 2013                                                  |
| SJ <sup>ab</sup>                                                                                           | Solidarités International                                                            | DSNi since 2013, DSSE and DSO since 2014                     |
| SRC <sup>a</sup>                                                                                           | Swiss Red Cross                                                                      | DSO in 2013                                                  |
| UNOPS <sup>a</sup>                                                                                         | United Nations Office for Project Services                                           | DSS in 2013, DSO in 2014                                     |
| ZL <sup>ab</sup>                                                                                           | Zanmi Lasante                                                                        | DSC (part of the response strategy in 2013-2014)             |
| Health organizations (contracted by other agencies or independent)                                         |                                                                                      |                                                              |
| GHESKIO <sup>b</sup>                                                                                       |                                                                                      | Port-au-Prince Metropolitan Area in 2013-2014                |
| IMC                                                                                                        | International Medical Corps                                                          | DSN and DSNE since 2014                                      |
| IOM                                                                                                        | International Organization for Migration                                             | DSO and DSA since 2014, DSSE in 2013                         |
| MDM                                                                                                        | <i>Médecins du Monde</i> consortium (Belgium, France, Spain sections)                | DSGA, DSNi and DSO since 2013, DSS, DSA and DSNO since 2014  |
| MSF-H                                                                                                      | <i>Médecins sans Frontières</i> – Netherlands                                        | Entire country since 2010                                    |

<sup>a</sup> organizations for which interventions were included in the study

<sup>b</sup> organizations that received UNICEF funds via the alert-response strategy

Department abbreviations: DSA, Artibonite; DSC, Centre; DSGA, Grand'Anse; DSNi, Nippes; DSN, Nord; DSNE, Nord-Est; DSNO, Nord-Ouest; DSO, Ouest; DSS, Sud; and DSSE, Sud-Est.
