# Supplementary material for: The case-area targeted rapid response strategy to control cholera in Haiti: a four-year implementation study
Source: PubMed Central journal article supplement (PMC6485755; doi:10.1371/journal.pntd.0007263), 2019-04-16

S1 Figure. Organization of cholera surveillance and rapid response in Haiti.

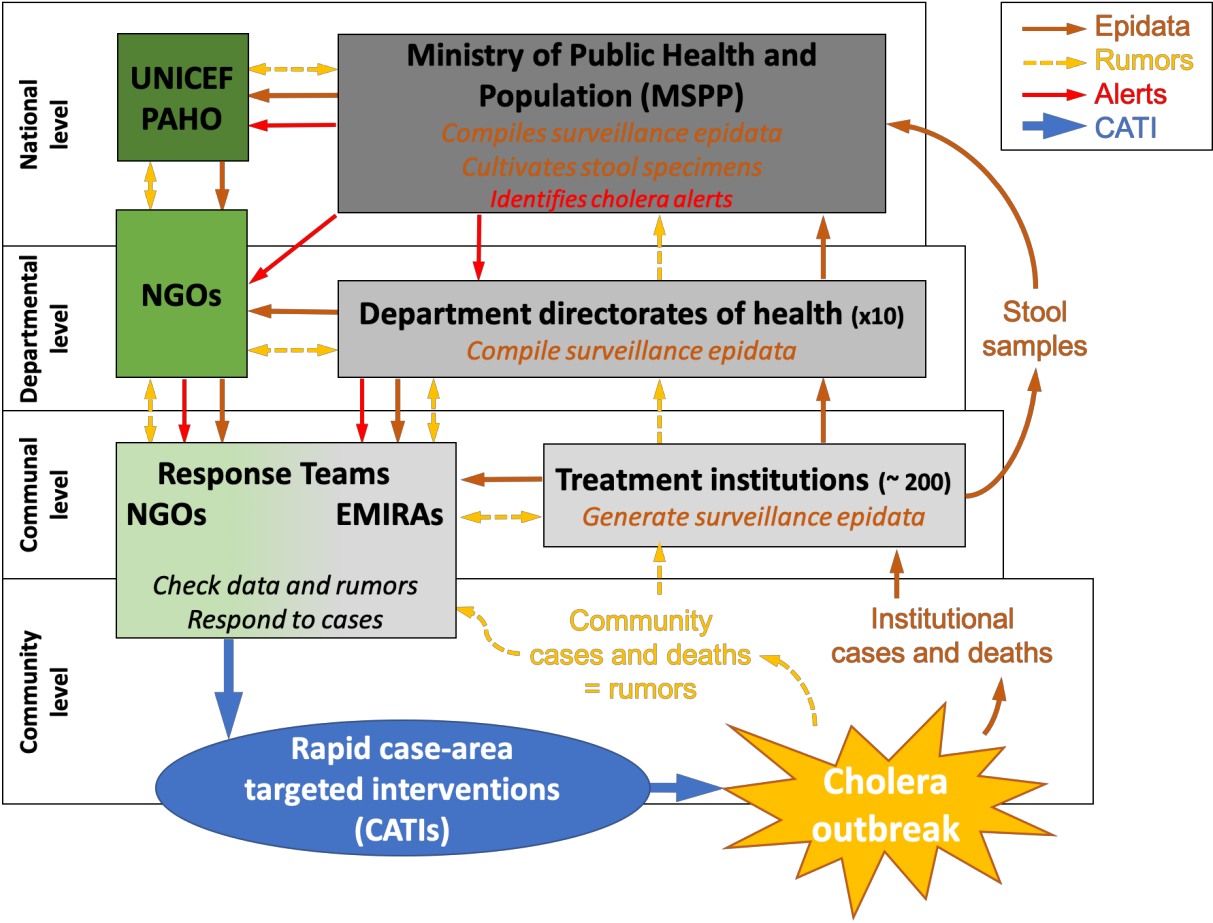

Supplement: pntd.0007263.s002.pdf [file pntd.0007263.s002.pdf]
