# Supplementary material for: The case-area targeted rapid response strategy to control cholera in Haiti: a four-year implementation study
Source: PubMed Central journal article supplement (PMC6485755; doi:10.1371/journal.pntd.0007263), 2019-04-16
Supplement: pntd.0007263.s004.pdf [file pntd.0007263.s004.pdf]

## S2 Table. Definitions of cholera alerts used in the study

---

### Red alert

≥1 cholera-associated hospital or community death of an individual ≥ five years of age during the past seven days

*and/or* ≥10 suspected cholera cases aged ≥ five years during the past seven days

*and/or* ≥1 stool culture positive for *Vibrio cholerae* O1 at the LNSP

---

### Orange alert

No red alert criteria

*and* Twofold or more increase in suspected cases aged ≥ five years during the past seven days compared with the previous seven-day period

*and/or* Red alert during the previous week

---

### Green alert

No red or orange alert criteria for at least two weeks

---

Official cholera alert criteria used by the Directorate of Epidemiology Laboratory and Research (DELR) of the Haitian Ministry of Health

LNSP, National Laboratory of Public Health
