# Supplementary material for: The case-area targeted rapid response strategy to control cholera in Haiti: a four-year implementation study
Source: PubMed Central journal article supplement (PMC6485755; doi:10.1371/journal.pntd.0007263), 2019-04-16
Supplement: pntd.0007263.s005.pdf [file pntd.0007263.s005.pdf]

**S3 Table. Response to alerts, CATI activities in responded alerts, numbers of complete CATIs for responded alerts. Differences between departments, NGOs, alert levels, and semesters over the course of the study.**

|                                | <b>All alerts</b> | <b>Responded alerts</b> | <b>Non-responded alerts</b> | <b>Education session in responded alerts</b> | <b>Decontamination by spraying in responded alerts</b> | <b>Distribution of chlorine tablets in responded alerts</b> | <b>Chlorination at water sources in responded alerts</b> | <b>Complete CATIs in responded alerts</b> |
|--------------------------------|-------------------|-------------------------|-----------------------------|----------------------------------------------|--------------------------------------------------------|-------------------------------------------------------------|----------------------------------------------------------|-------------------------------------------|
|                                | no.               | no. (%)                 | no. (%)                     | mean no. of persons (SD)                     | mean no. of houses (SD)                                | mean no. of households (SD)                                 | mean no. of sources (SD)                                 | mean no. (SD)                             |
| <b>All alerts</b>              | 7856              | 3824 (49%)              | 4032 (51%)                  |                                              |                                                        |                                                             |                                                          |                                           |
| <b>Responded alerts</b>        |                   |                         |                             | 545 (1551)                                   | 37 (68)                                                | 141 (579)                                                   | 0.4 (2.6)                                                | 5.1 (7.8)                                 |
| <b>Alert level</b>             |                   |                         |                             |                                              |                                                        |                                                             |                                                          |                                           |
| <i>Red</i> alerts              | 4365              | 2516 (58%)              | 1849 (42%)                  | 683 (1842)                                   | 47 (76)                                                | 171 (663)                                                   | 0.5 (3.1)                                                | 6.4 (8.8)                                 |
| <i>Orange</i> alerts           | 3491              | 1308 (37%)              | 2183 (63%)                  | 278 (631)                                    | 19 (44)                                                | 82 (361)                                                    | 0.3 (1)                                                  | 2.7 (4.4)                                 |
| <b>Department</b>              |                   |                         |                             |                                              |                                                        |                                                             |                                                          |                                           |
| DSNO                           | 560               | 329 (59%)               | 231 (41%)                   | 417 (1724)                                   | 28 (31)                                                | 120 (1137)                                                  | 0.8 (1.7)                                                | 2.8 (3.1)                                 |
| DSN                            | 1150              | 463 (40%)               | 687 (60%)                   | 639 (1508)                                   | 25 (31)                                                | 82 (386)                                                    | 0.1 (0.8)                                                | 3.5 (4)                                   |
| DSNE                           | 423               | 206 (49%)               | 217 (51%)                   | 635 (2162)                                   | 32 (42)                                                | 99 (283)                                                    | 0.2 (1.2)                                                | 3.2 (3.4)                                 |
| DSA                            | 1297              | 704 (54%)               | 593 (46%)                   | 404 (635)                                    | 21 (27)                                                | 170 (691)                                                   | 0.4 (2.6)                                                | 3.2 (5.4)                                 |
| DSC                            | 1035              | 412 (40%)               | 623 (60%)                   | 443 (2827)                                   | 30 (30)                                                | 116 (523)                                                   | 1.2 (6.3)                                                | 5 (6.1)                                   |
| DSO                            | 1493              | 803 (54%)               | 690 (46%)                   | 773 (1491)                                   | 76 (123)                                               | 155 (257)                                                   | 0.1 (1)                                                  | 10.4 (12.8)                               |
| DSNI                           | 349               | 220 (63%)               | 129 (37%)                   | 173 (354)                                    | 16 (25)                                                | 68 (321)                                                    | 0.3 (0.9)                                                | 4.2 (4.5)                                 |
| DSSE                           | 500               | 258 (52%)               | 242 (48%)                   | 216 (354)                                    | 27 (41)                                                | 35 (41)                                                     | 0.1 (0.4)                                                | 4.8 (4.9)                                 |
| DSS                            | 475               | 239 (50%)               | 236 (50%)                   | 1152 (1436)                                  | 53 (71)                                                | 394 (838)                                                   | 1.4 (2.3)                                                | 4.1 (5.5)                                 |
| DSGA                           | 574               | 190 (33%)               | 384 (67%)                   | 329 (563)                                    | 16 (23)                                                | 159 (548)                                                   | 0.5 (1.4)                                                | 2.9 (3.6)                                 |
| <b>Semester since mid-2013</b> |                   |                         |                             |                                              |                                                        |                                                             |                                                          |                                           |
| S1 (Jul 2013 - Dec 2013)       | 1438              | 213 (15%)               | 1225 (85%)                  | 1557 (4739)                                  | 6 (20)                                                 | 726 (1782)                                                  | 0.1 (0.6)                                                | 0.7 (1.7)                                 |
| S2 (Jan 2014 - Jun 2014)       | 561               | 87 (16%)                | 474 (84%)                   | 749 (1065)                                   | 3 (8)                                                  | 820 (1907)                                                  | 0.1 (0.4)                                                | 0.3 (1)                                   |
| S3 (Jul 2014 - Dec 2014)       | 935               | 388 (41%)               | 547 (59%)                   | 966 (2015)                                   | 23 (34)                                                | 124 (297)                                                   | 0.9 (3.6)                                                | 2.3 (3)                                   |
| S4 (Jan 2015 - Jun 2015)       | 896               | 456 (51%)               | 440 (49%)                   | 929 (1752)                                   | 38 (63)                                                | 150 (303)                                                   | 1 (6)                                                    | 4.1 (7.3)                                 |
| S5 (Jul 2015 - Dec 2015)       | 962               | 559 (58%)               | 403 (42%)                   | 454 (581)                                    | 34 (41)                                                | 76 (148)                                                    | 0.4 (1.3)                                                | 5.7 (8.4)                                 |
| S6 (Jan 2016 - Jun 2016)       | 1145              | 762 (67%)               | 383 (33%)                   | 261 (356)                                    | 33 (49)                                                | 56 (141)                                                    | 0.3 (0.9)                                                | 5.5 (8.1)                                 |
| S7 (Jul 2016 - Dec 2016)       | 1179              | 804 (68%)               | 375 (32%)                   | 331 (745)                                    | 40 (55)                                                | 73 (241)                                                    | 0.3 (1.4)                                                | 6.1 (6.7)                                 |
| S8 (Jan 2017 - Jun 2017)       | 740               | 555 (75%)               | 185 (25%)                   | 305 (454)                                    | 67 (130)                                               | 92 (159)                                                    | 0.3 (1.5)                                                | 7.8 (10.6)                                |

(continued)

|                             | <b>All alerts</b> | <b>Responded alerts</b> | <b>Non-responded alerts</b> | <b>Education session in responded alerts</b> | <b>Decontamination by spraying in responded alerts</b> | <b>Distribution of chlorine tablets in responded alerts</b> | <b>Chlorination at water sources in responded alerts</b> | <b>Complete CATIs in responded alerts</b> |
|-----------------------------|-------------------|-------------------------|-----------------------------|----------------------------------------------|--------------------------------------------------------|-------------------------------------------------------------|----------------------------------------------------------|-------------------------------------------|
|                             |                   | no. (%)                 | no. (%)                     | mean no. of persons (SD)                     | mean no. of houses (SD)                                | mean no. of households (SD)                                 | mean no. of sources (SD)                                 | mean no. (SD)                             |
| <b>NGO on duty for CATI</b> |                   |                         |                             |                                              |                                                        |                                                             |                                                          |                                           |
| NGO #1                      | 1602              | 828 (52%)               | 774 (48%)                   | 388 (1163)                                   | 22 (28)                                                | 165 (956)                                                   | 0.6 (2.6)                                                | 1.8 (2.5)                                 |
| NGO #2                      | 1298              | 758 (58%)               | 540 (42%)                   | 778 (1316)                                   | 42 (63)                                                | 227 (564)                                                   | 0.7 (1.9)                                                | 6.2 (7.1)                                 |
| NGO #3                      | 142               | 9 (6%)                  | 133 (94%)                   | 1427 (873)                                   | 0 (0)                                                  | 1137 (1008)                                                 | 0 (0)                                                    | 0 (0)                                     |
| NGO #4                      | 657               | 383 (58%)               | 274 (42%)                   | 474 (1006)                                   | 36 (75)                                                | 97 (168)                                                    | 0 (0.2)                                                  | 6 (8.2)                                   |
| NGO #5                      | 32                | 29 (91%)                | 3 (9%)                      | 1256 (312)                                   | 3 (5)                                                  | 194 (98)                                                    | 0 (0)                                                    | 0 (0)                                     |
| NGO #6                      | 39                | 35 (90%)                | 4 (10%)                     | 527 (487)                                    | 74 (69)                                                | 107 (98)                                                    | 0.2 (0.8)                                                | 11 (11.2)                                 |
| NGO #7                      | 280               | 17 (6%)                 | 263 (94%)                   | 3656 (3418)                                  | 0 (1)                                                  | 997 (1187)                                                  | 0.1 (0.2)                                                | 0.4 (0.7)                                 |
| NGO #8                      | 232               | 5 (2%)                  | 227 (98%)                   | 146 (135)                                    | 8 (7)                                                  | 7 (7)                                                       | 0 (0)                                                    | 0.6 (0.5)                                 |
| NGO #9                      | 1752              | 943 (54%)               | 809 (46%)                   | 456 (1342)                                   | 28 (33)                                                | 69 (253)                                                    | 0.3 (1.1)                                                | 3.9 (3.9)                                 |
| NGO #10                     | 1194              | 727 (61%)               | 467 (39%)                   | 375 (870)                                    | 65 (116)                                               | 94 (237)                                                    | 0.1 (0.6)                                                | 9.6 (12.5)                                |
| NGO #11                     | 108               | 31 (29%)                | 77 (71%)                    | 2161 (3182)                                  | 1 (3)                                                  | 109 (452)                                                   | 0 (0.2)                                                  | 0.2 (0.5)                                 |
| NGO #12                     | 510               | 59 (12%)                | 451 (88%)                   | 1538 (7341)                                  | 26 (31)                                                | 317 (1277)                                                  | 4.9 (16)                                                 | 1 (0.9)                                   |
